# Supplementary material for: Chl1 helicase controls replication fork progression by regulating dNTP pools
Source: Life Sci Alliance. 2022 Jan 11;5(4):e202101153. doi: 10.26508/lsa.202101153 (PMC8761496; doi:10.26508/lsa.202101153)
Supplement: Supplementary file 2 [file LSA-2021-01153_TableS2.xlsx]

## Sheet: Table S2
Table S2: List of primers used for qPCR
Number	Name	Sequence
oHA-51	SMC2_F	AATTGGATTTGGCTAAGCGTAATC
oHA-52	SMC2_R	CTCCAATGTCCCTCAAAATTTCTT
oHA-605	ARS607_F	CTTTAGCTGGGTTTATGGGAGGTT
oHA-606	ARS607_R	TAATGCACGAGCCGAAACAA
oHA-2675	ARS607+1kb_F	GGAGAGAATCTTACCTCAGAGTGC
oHA-2676	ARS607+1kb_R	GGGATCTTGAAAGTAAAACAGGTG
oHA-2677	ARS607+2kb_F	CGCAGCAGTGGAGTTATCAG
oHA2678	ARS607+2kb_R	TAATCCACTTTGTCGGGCCA
oHA-2679	ARS607+3kb_F	CTTTGTTATGGACCCGGAGA
oHA-2680	ARS607+3kb_R	CATCAAGATGGAATACTGTGACAA
oHA-607	ARS607+4kb_F	TATGCTATCGTCGAGATGTTGTTCT
oHA-608	ARS607+4kb_R	GGTGGAAGCGCAGGTTGATC
oHA-2681	ARS607+6kb_F	GTTTCACCTCGTAGTCCCTCA
oAH-2682	ARS607+6kb_R	AACCAAATGCATTGCTTTATCA
oHA-2977	ARS607+7kb_F	GACGCTTACGTTCAGGTTC
oHA-2978	ARS607+7kb_R	GCCAATGTAGCAGCGATAG
oHA-2979	ARS607+8kb_F	AAGTTGGGTCAAAGAGAAAGG
oHA-2980	ARS607+8kb_R	CTCTCCATTGCTTCCCTAAAAC
oHA-2981	ARS607+10kb_F	ATGAAAAGGCGAAGACGAG
oHA-2982	ARS607+10kb_R	AAGAAGAAGAAACCGACGATG
oHA-609	ARS607+14kb_F	CAGGATATGCGGCCAAATTT
oHA-610	ARS607+14kb_R	GCATGACAGCCGAATCGAT
oHA-611	ARS501_F	AAGCAAATTGCAGAAGGTTATGAA
oHA-612	ARS501_R	TTCAAGGCTCTAGCATATGAAACG
oHA-1537	ARS305_F	CGCCCGACGCCGTAA
oHA-1538	ARS305_R	GAGCGGCCTGAAATACTGTCA
oHA-1539	ARS305+2.6kb_F	CAAAGGTCGGCTGCTTCAAT
oHA-1540	ARS305+2.6kb_R	GGTATAGGCCAGGGAAGAAGGT
oHA-1541	ARS305+5.9kb_F	AAGAAAGAAAAGCATTCCAGAGACA
oHA-1542	ARS305+5.9kb_R	TGCTAACTGATGTGCCAAAGTCA
oHA-1543	ARS305+13.5kb_F	GGCAGAAAGGAACTACAGGTCTTG
oHA-1544	ARS305+13.5kb_R	TCTGCACCCTGGTTAAGTTTCTT
oHA-1840	ARS305+11kb_F	CGCCCGACAGGGTAACATAT
oHA-1841	ARS305+11kb_R	GCGACAAACCTTTCGAAACAC
oHA-2738	ARS305+1kb right _F	GGAATCTGTCCGGTGTTTCG
oHA-2739	ARS305+1kb right _R	TGGGCACCTGCCTCTGA
oHA-2740	ARS305+2kb right _F	CTTTGCCTAGCGCACTGTTA
oHA-2741	ARS305+2kb right _R	TTTGTCCCACCTTCCCTTTG
oHA-2742	ARS305+3kb right _F	GCATTGGGTGCCGCTATT
oHA-2743	ARS305+3kb right _R	GTTCGAGATTACCGTTATGAAAAGG
oHA-2744	ARS305+4kb right _F	GCAGAAGATTGGTGGAACATTAG
oHA-2745	ARS305+4kb right _R	GCCACCTTGAATGTCTGTTAAG
oHA-2746	ARS305+5kb right _F	AGCACATCATTTCCAGACGAGTT
oHA-2747	ARS305+5kb right _R	GACACCCGTTCGCATGTTT
oHA-2122	TAF10_F	ATATTCCAGGATCAGGTCTTCCGTAGC
oHA-2123	TAF10_R	GTAGTCTTCTCATTCTGTTGATGTTGTTGTTG
oHA-2699	Conv32W-31C_F	CCGGTGGAAGACTCTAATGTG
oHA-2700	Conv32W-31C_R	GCATACATGTTATCCTATTCGTGTAAG
oHA-2707	CARL3_F	ATG CCA CCT ACC GAC CAA CTT TCA
oHA-2708	CARL3_R	AGA GGT GTT ATG GGT GGA GGA CAA
oHA-2709	CARL3-N_F	TCC ACTTTCAACCGTCCCTCCAAA
oHA-2710	CARL3-N_R	AGAATGTCGGCGGCAGTATTGAGA
oHA-2600	RNR1_F	ATGCCTACTGCATCCACATC
oHA-2601	RNR1_R	GACACGACGGGAGTACATATTG
oHA-2602	RNR3_F	GCCTCCGCTGCTATTCAA
oHA-2603	RNR3_R	CAGATGCCGCCTTTTGTT
oHA-3461	RNR2_F	CTTTGCCTCCATTGAAGGTG
oHA-3462	RNR2_R	GTTAAACCGGGCATCATACC
oHA-3463	RNR4_F	GCATTTGCTGCAAAGGAAGG
oHA-3464	RNR4_R	GTTGGCCATTGCTAAACCTG
oHA-3512	HUG1_F	CCATGGACCAAGGCCTTAAC
oHA-3513	HUG1_R	GAAGGAACGTGATCCTTGGG
oHA-3582	SML1_F	CGCTCAAAATCGCTGCCAAC
oHA-3583	SML1_R	GCTGCCCATGGAGTTTTGAG
